# Supplementary material for: Impact of the different biliopancreatic limb length on diabetes and incretin hormone secretion following distal gastrectomy in gastric cancer patients
Source: PubMed Central journal article supplement (PMC8599427; doi:10.1038/s41598-021-02001-y), 2021-11-17

**Supplementary Figure 1.** Dynamic changes of gut hormones during OGTT by time point in each surgery group. (a)

active GLP-1, (b) GIP, (c) insulin, and (d) glucagon

(a) Active GLP-1

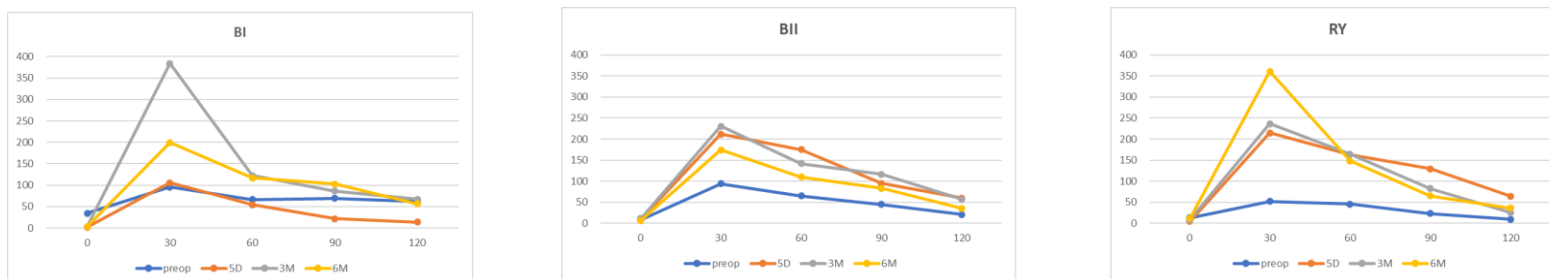

(b) GIP

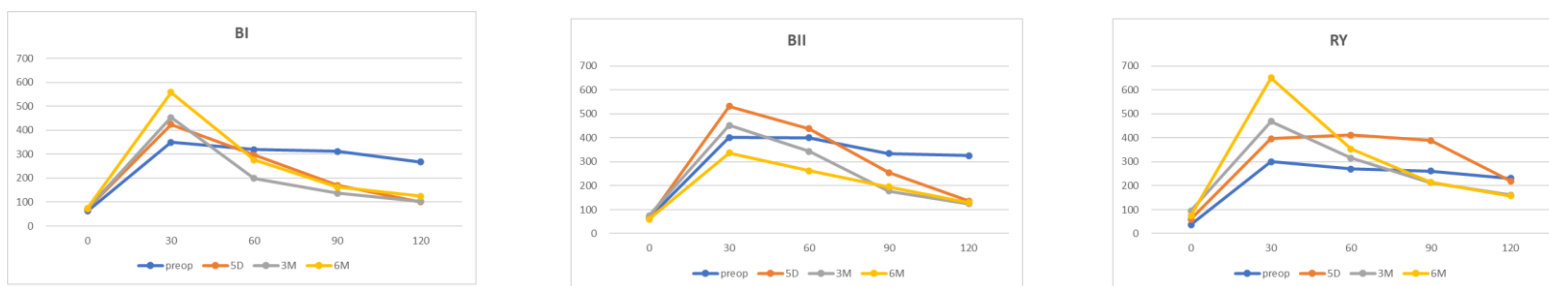

(c) insulin

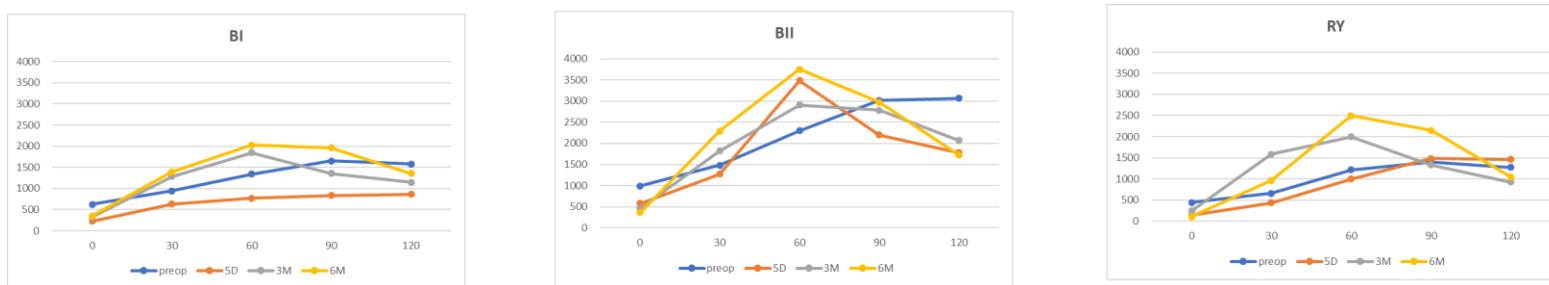

(d) glucagon

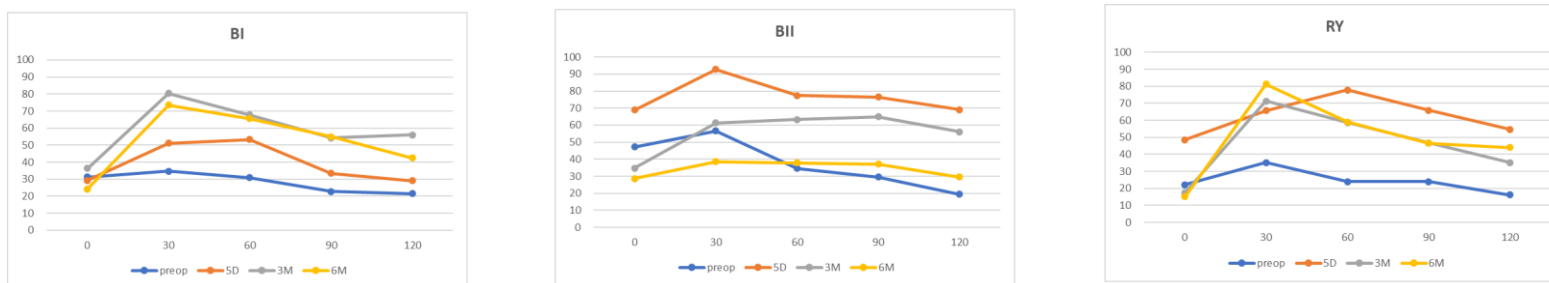

Supplement: 41598_2021_2001_MOESM1_ESM.pdf [file 41598_2021_2001_MOESM1_ESM.pdf]
